# Supplementary material for: A facile alkali metal hydroxide-assisted controlled and targeted synthesis of 1T MoS2 single-crystal nanosheets for lithium ion battery anodes
Source: Royal Society of Chemistry journal article supplement (doi:10.1039/c9nr04537f), 2019-01-01
Supplement: c9nr04537f1.pdf [file c9nr04537f1.pdf]

## Supporting Information for

### Facile alkali metal hydroxide-assisted controlled and targeted synthesis of 1T

#### MoS<sub>2</sub> single crystal nanosheets for lithium ion battery anodes

Zhao Li,<sup>a,b</sup> Xun Zhan<sup>b</sup> and Shuhua Qi<sup>a\*</sup>

*a. Department of Applied Chemistry, School of Natural and Applied Sciences,  
Northwestern Polytechnical University, Xi'an, Shaanxi 710072, China.*

*b. Department of Materials Science and Engineering, Frederick Seitz Materials  
Research Laboratory, University of Illinois at Urbana–Champaign, Urbana,  
Illinois 61801, United States.*

□ Corresponding author. Email: [qishuhuanwpu@163.com](mailto:qishuhuanwpu@163.com)

#### 1. Experimental Methods

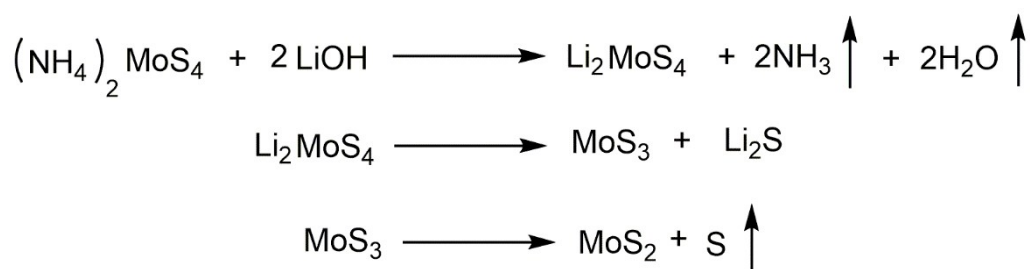

The whole reaction would be:

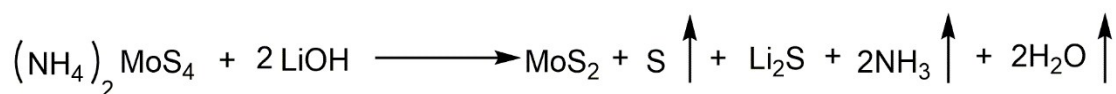

**Fig. S1. Chemical reaction schematic of MoS<sub>2</sub> nanosheets**

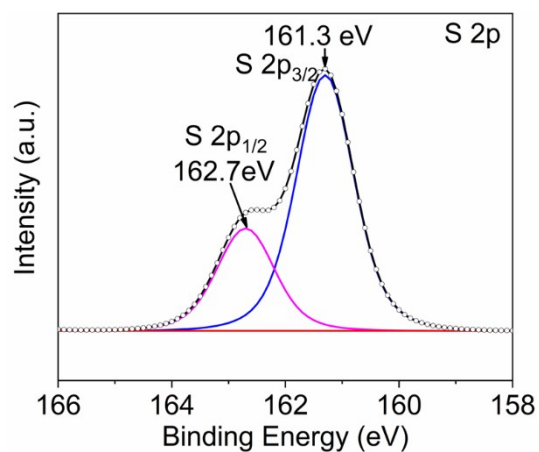

**Figure S2.** S 2p core-level peaks after Shirley background subtraction (red line is background curve) of 1T MoS<sub>2</sub> single crystal nanosheets.

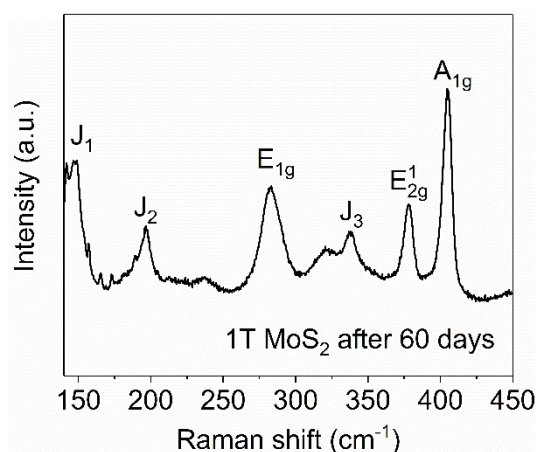

**Figure S3.** Raman spectra of 1T MoS<sub>2</sub> single crystal nanosheets after 60 days.

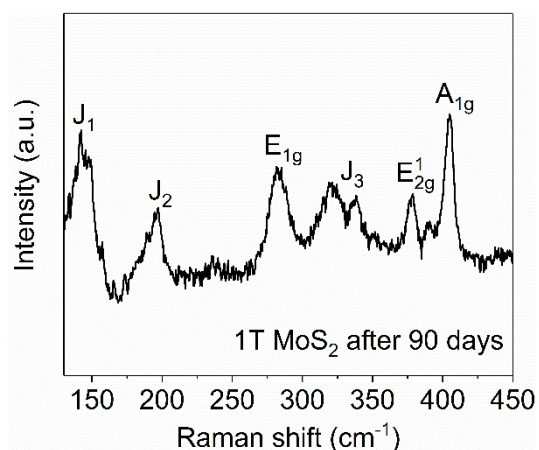

**Figure S4.** Raman spectra of 1T MoS<sub>2</sub> single crystal nanosheets after 90 days.

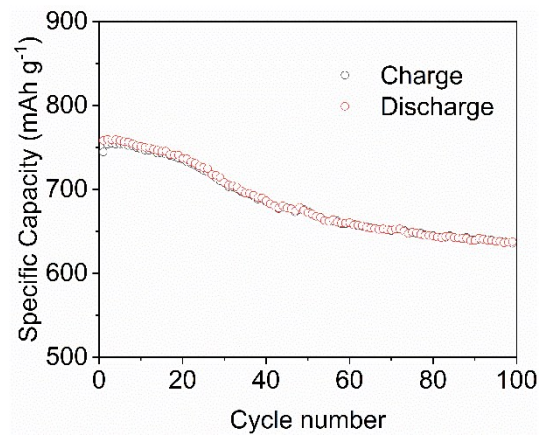

**Figure S5. Cycling capacity and Coulombic efficiency profiles at 0.5 C for 2H**

**MoS<sub>2</sub> electrode.**
